# Supplementary material for: Sensitive detection of 4-nitrophenol based on pyridine diketopyrrolopyrrole-functionalized graphene oxide direct electrochemical sensor
Source: Royal Society of Chemistry journal article supplement (doi:10.1039/d2ra07239d), 2023-01-01
Supplement: d2ra07239d1.pdf [file d2ra07239d1.pdf]

## Supplementary Material

### **Sensitive detection of 4-nitrophenol based on pyridine diketopyrrolopyrrole functionalized graphene oxide constructed direct electrochemical sensor**

Lingpu Jia<sup>\*a</sup>, Juan Hao<sup>b</sup>, Shuangshuang Wang<sup>c</sup>, Long Yang<sup>c</sup>, Kunping Liu<sup>b</sup>

<sup>a</sup> Key Laboratory of Medicinal and Edible Plants Resources Development of Sichuan Education Department, Institute for Advanced Study, Chengdu University, Chengdu 610106, China.

<sup>b</sup> Key Laboratory of Medicinal and Edible Plants Resources Development of Sichuan Education Department, Sichuan Industrial Institute of Antibiotics, School of pharmacy, Chengdu University, Chengdu 610106, China.

<sup>c</sup> State Key Laboratory of Environment-Friendly Energy Materials, School of Materials Science and Engineering, Southwest University of Science and Technology, Mianyang 621010, China.

Corresponding author: [jialingpu@cdu.edu.cn](mailto:jialingpu@cdu.edu.cn)

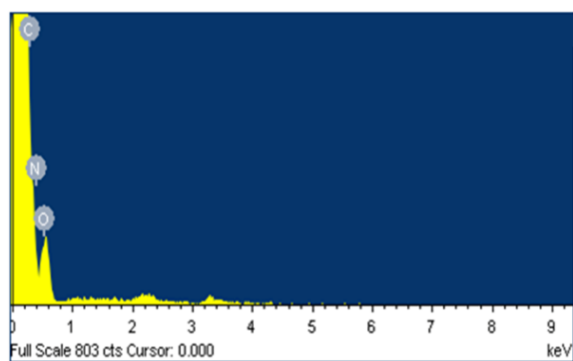

Figure S1 EDS spectrum of PDPP-GO

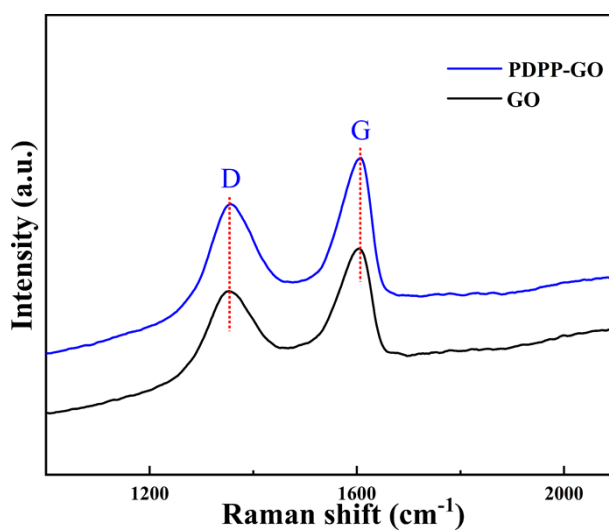

Figure S2 Raman spectrums of GO and PDPP-GO.
